# Supplementary material for: The Transcription Factor MiMYB8 Suppresses Peel Coloration in Postharvest ‘Guifei’ Mango in Response to High Concentration of Exogenous Ethylene by Negatively Modulating MiPAL1
Source: MDPI journal article supplement (doi:10.3390/ijms25094841), 2024-04-29
Supplement: s1 [file s1]

**Table S1** Summary of Primers Used in This Study.

| Assay                    | Genes                            | Vectors            | Reverse Primers (5'-3')                                                                                                 |
|--------------------------|----------------------------------|--------------------|-------------------------------------------------------------------------------------------------------------------------|
| qRT-PCR                  | <i>MiMYB6</i>                    | none               | Forward: TGGCTGCAACACAAGAAGGA<br>Reverse: TTCAGTCTCGAGCCTACCCA                                                          |
|                          | <i>MiMYB5</i>                    | none               | Forward: AGAAACCAAGGAACCGACCC<br>Reverse: TTGGCTTTGGGAGATGGACC                                                          |
|                          | <i>MiMYB8</i>                    | none               | Forward: CGGCGGTGTTAATGTGGATG<br>Reverse: CTTTCGCTCCACTCTCAGGG                                                          |
|                          | <i>MiPAL1</i>                    | none               | Forward: GCTGTTGGTTCTGGCTTAGC<br>Reverse: AGCACCATTCCAACCACTGA                                                          |
|                          | <i>MiPAL2</i>                    | none               | Forward: AGGAGGTGGAGAGTGCTAGA<br>Reverse: GCCGCCAGAGAGATTTGATG                                                          |
|                          | <i>MiActin</i>                   | none               | Forward: AATGGAAGTGAATGGTCAAGGG<br>Reverse: TGCCAGATCTTCTCCATGTCATCCCA                                                  |
|                          | <i>MiMYB8</i>                    | pCambia1302-GFP    | Forward: <u>CCATGG</u> ATGGCGTTTAATAGAAAAGAAGTGGATCGG(NcoI)<br>Reverse: <u>ACTAGT</u> GATCCTCTGCAGCGCGACATTT(SpeI)      |
|                          | <i>MiMYB8</i>                    | none               | Forward: ATGGCGTTTAATAGAAAAGAAGTGGATCGG<br>Reverse: TCAGATCCTCTGCAGCGCGACATTT                                           |
|                          | <i>MiPAL1</i><br><i>promoter</i> | none               | Forward: CATAAGAATCATGCAAGCCATACAGAG<br>Reverse: TGAACAAAGGGACGGATAGCTACG                                               |
| Transient overexpression | <i>MiMYB8</i>                    | pGreen II 62-SK    | Forward: <u>GGATCC</u> ATGGCGTTTAATAGAAAAGAAGTGGATCGG(BamHI)<br>Reverse: <u>GAATTC</u> TCAGATCCTCTGCAGCGCGACATTT(EcoRI) |
| Y1H                      | <i>MiPAL1</i><br><i>promoter</i> | pHIS2              | Forward: <u>GAATTC</u> CATAAGAATCATGCAAGCCATACAGAG(EcoRI)<br>Reverse: <u>GAGCTC</u> TGAACAAAGGGACGGATAGCTACG(SacI)      |
|                          | <i>MiMYB8</i>                    | pGADT7             | Forward: <u>GGATCC</u> ATGGCGTTTAATAGAAAAGAAGTGGATCGG(EcoRI)<br>Reverse: <u>GAATTC</u> TCAGATCCTCTGCAGCGCGACATTT(BamHI) |
|                          | <i>MiPAL1</i><br><i>promoter</i> | pGreen II 0800-LUC | Forward: <u>GGTACC</u> CATAAGAATCATGCAAGCCATACAGAG(KpnI)<br>Reverse: <u>GGATCC</u> TGAACAAAGGGACGGATAGCTACG(BamHI)      |
| DLR                      | <i>MiMYB8</i>                    | pGreen II 62-SK    | Forward: <u>GGATCC</u> ATGGCGTTTAATAGAAAAGAAGTGGATCGG(BamHI)<br>Reverse: <u>GAATTC</u> TCAGATCCTCTGCAGCGCGACATTT(EcoRI) |

**Table S2** Nucleotide Sequences of MiPAL1, MiPAL1 Promoter and MiMYB8.

| Genes                      | Sequence                                                                                                                                                                                                                                                                                                                                                                                                                                                                                                                                                                                                                                                                                                                                                                                                                                                                                                                                                                                                                                                                                                                                                                                                                                                                                                                                                                                                                                                                                                                                                                                                                                                                                                                                                                                                                        |
|----------------------------|---------------------------------------------------------------------------------------------------------------------------------------------------------------------------------------------------------------------------------------------------------------------------------------------------------------------------------------------------------------------------------------------------------------------------------------------------------------------------------------------------------------------------------------------------------------------------------------------------------------------------------------------------------------------------------------------------------------------------------------------------------------------------------------------------------------------------------------------------------------------------------------------------------------------------------------------------------------------------------------------------------------------------------------------------------------------------------------------------------------------------------------------------------------------------------------------------------------------------------------------------------------------------------------------------------------------------------------------------------------------------------------------------------------------------------------------------------------------------------------------------------------------------------------------------------------------------------------------------------------------------------------------------------------------------------------------------------------------------------------------------------------------------------------------------------------------------------|
| <i>MiPAL1</i>              | ATGTTGGTGAGAATCAACACCCTGTTACAAGGATACTCAGGTATCAGGTTTGATATCCTGGAAGCCATCACCAACTT<br>CCTTAACCATAACGTCACCCCGTGTCTGCCACTCCGTGGCACAATCACTGCATCGGGTGACCTGGTTCGGTTATCAT<br>ACATTGCCGGACTCTTGACTGGAAGGCCAAACTCGAAGGCAGTTGGGCCAAATGGGCAAGTCTGTAATGCCAATG<br>AAGCCTTTCAACTTGCTGGTATCCATGGTGGATTCTTTGAGTTGCAACCTAAAGAGGGTCTTGCTTTAGTGAATGGC<br>ACGGCTGTTGGTTCTGGCTTAGCTTCAATGGTGTCTTTTGGAGGCTAACATACTTGCTATTCTATCAGAAGTTTGTCA<br>GCAATTTTGCAGAAGTTATGAATGGAAAACCTGAGTTTACTGATCACTTGACACATAAATTGAAGCACCATCCGGG<br>CCAAATTGAAGCTGCAGCTATCATGGAGCACATTTAGCTGGCAGCAGTTATGTTAAAGCAGCTCAAAAGTTGCAT<br>GAGATTGATCCTCTTCAGAAGCCAAAGCAAGATAGATACGCTCTTAGAACATCTCCTCAATGGCTAGGCCCCACAGAT<br>TGAAGTGATTTCGTGCTGCGACGAAAATGATCGAGAGAGAGATCAACTCTGTGAATGATAATCCATTGATTGATGTTT<br>CAAGAAGTAAGGCGCTACATGGAGGCAATTTCCAGGGGACCCCAATTGGTGTTTCCATGGATAACACACGTCTTGC<br>CATTGCCCTCCATTGGTAAACTCATGTTTGACAATTTCTCCGAGCTGGTTAATGACTTCTACAACAATGGATTGCCTTC<br>AAATCTTTCTGGCGGTGCGAATCCAAGCTTGGATTATGGATTCAAGGGTGCCGAAATCGCGATGGCATCTTACTGTT<br>CTGAACCTCAATTCCTTGCCAATCCTGTCAACCAATCATGTCCAGAGCGCTGAGCAACACAACCAAGATGTGAACCTC<br>TTTAGGCTCATTTCTTCAAGAAAAACAGCTGAAGCTGTTGATATATTGAAGCTCATGTCCTCTACTTATTTAATTGC<br>TCTATGCCAAGCCATTGACTTGAGGCATTGGAGGAGAACTTAAAAAACACTGTGAAGAACACAGTAAGTCAGTT<br>GGCCAAGAACTCCTGACAATGGGATTCAATGGCGAACTTCAACCATCAAGATTCTGCGAAAAAGACTTGATCAA<br>AGTTGTGGACAGGGAATACGTTTTTGCATACATTGACGATCCCTGCAGTGCAACCTACCCATTAATGCAGAAACTAA<br>GGCAAGTCCTAGTTGAACATGCCATGGCCAATGGTGAAAAAGGAGAAAAACTCAAGCACTTCAATTTTCCAGAAGA<br>TTGAGTCTTTGAGGAGGAACTGAAAACCCAGCTTCCCAAAGATGTCGAAAAGCACAAGGATCGAAATTGAGAATG<br>GAAATGCAGCAGTTCCAAACAAGATCAAGGAATGCAGGTCTATCCATTATACAAATTTGTGCGAGAAGAACTTGG<br>AACAAAGTTTTCTAACTGGTGAGAAAAGTAAGGTCACCGGGTGAGGAATTTGACAAAGTTTTCTCAGCAATGTGTGC<br>AGGAAAGTTGATTGATCCCATGATGGAATGTTTAAAGGAGTGGAATGGAGCTCCTCTCCTCTCTCCTAG |
| <i>MiPAL1<br/>promoter</i> | CATAAGAATCATGCAAGCCATACAGAGACACAAAACTTTTTATGTAAATTTCTGGTGTAATAAATTTCTTTTCCCTG<br>TAACCATGCAACTGTGATGTGGTTGACTAATTATTTTTCTTATATAAGATTTCAAACTATATTAAATATGTAAATTTT<br>AATTGATTAATTAATTTTATAATTATTTTATAAAATAAATTAATTTTAAATTTTAAATTTTGTGCAAAAAATCTTTACT<br>TTCTTATGCTTAAAATTCACCTTATATCACTCTAATGATCAAGAAAATTAAGATTTTAGGTGCTATTATTATTATTTTT<br>GGTCACTTTCCCAATCCAAATTGAAATGTAAATCTTGAAGTGAACAACCTTCACTACGTTGAAAATTTCAAAACAG<br>ACCAATAATACGTCTCTTTACCCAGTTTAGGGCACCATATGCAACTAATCTAATCCACCCCATTTTTTCTCTTCAAAT<br>TATTTATATAATATAAAAAAGATCAATCTAGTAAGAATTAATCAATGATCATTGACTCATTTCATACCCACAAAAATAT<br>AAAATCTAACCTAATTTTTTCGTATTAAAGTGAAACAAAATATGTACCTCCCAAAATATATTAGGTTTTCAACTAGTGT<br>TTGAAGACATCAAAATTTATGGTGGAACATCATCCATGGAAGAAAGAAAGAAATCTTAAATTTTTCATAGAAAAAA<br>CCTTTGCTTAATATTTAGAAGATAAATATATTTTGAATTTAATGTGGCATTGACAGTTGGTTTGAATTAATGCAAG<br>CTAAAAAATGGTTAAAATAAATTACTTTACCTAAAATTAGATTAGCAGCAGCCGCTAAGAAACCACATAACTCCTAA<br>TTAACCAATCAATTAATTAGCTTAATTACCTGATAAGCTCCTTCTGACAGGGCGCCACCTTCCTTCGTTTCGCTATG<br>CGACGTCGCACCGAAGCCAGTGGTCACTCCGTAGCTATCCGTCCCTTTGTTCA                                                                                                                                                                                                                                                                                                                                                                                                                                                                                                                                                                                                                                                                                                                                                        |
| <i>MiMYB8</i>              | ATGGCGTTTAATAGAAAAGAAGTGATCGGATCAAGGGCCCGTGGAGCCAGAGGAGGACGAGGCGTTACAACAG<br>CTTGTGCAAAAGCATGGCCCAAGAACTGGTCTGTGATAAGCAAGTCAATTCCGGGGCGATCCGGCAAGTCTTGCC<br>GTCTCCGGTGGTGCAATCAGCTCTCTCCGCAAGTTGAGCACCGCTCCTTCACACCTGAAGAAGACGAGACTATATT<br>ACGCGCTCATGCTCGCTTCGGCAACAAGTGGGCGACAATCGCCCGGCTTCTCAACGGCCGTACAGACAACGCGAT<br>AAAAAACCACTGGAATCGACCTTGAAACGGAAAGTGTTCAAGGTTGATGGCAGAGGATGGTAATTTTATCAACTGT<br>AATGGGTACGACGGGGATTAGGTCATAAATCAAAATCAGCCGTTGAAAAGATCTGTAAGTGCAGGATCAGGTG<br>TGCCGTGACCCACGGGGCTTTACGTGAACCCGAGTAGTCCATCTGGATCTGACGTAAGCGATTCCAGCGTACACGT<br>ATTTTCGTGCAATCACAACATATTTAAACCCGTTGCGAGAGCCGGCGGTGTTAATGTGGATGTGAATGTAATCCCCG<br>AAACGACATCGTCGAGCAACGATCCGCCAACTTCACTGAGTCTATCACTTCCAGGCGCCGATTCAAGCGAAGATAC<br>GAACCAGAAAGCAGCGGAGTCAAGTAAGGCTATAAATACTAAGAGTTTGTTCCTGAGAGTGAGCGAAAGGCGG<br>TGGCTTTCTAGGGTTTAGTCAAGAGTTTATGGGAGTGATGCAGGAGATGATAAGGCAGGAGGTGAGGAATTACATG<br>GCTTCCCTTGAACAACAGAGAGGTGGAGTTTGTATCAGAGTAGTGGCGGTGGCGGCGGCGACGGTGTCTTTAGA<br>AATGTCGCGCTGCAGAGGATCTGA                                                                                                                                                                                                                                                                                                                                                                                                                                                                                                                                                                                                                                                                                                                                                                                                                    |
